# Supplementary material for: Band-bending engineering in Cu2ZnSnS4 photocathodes using a composite (Zn,Ti)O electron transport layer for solar water splitting
Source: Royal Society of Chemistry journal article supplement (doi:10.1039/d6sc00648e), 2026-04-29
Supplement: d6sc00648e1.pdf [file d6sc00648e1.pdf]

## **Band-Bending Engineering in $\text{Cu}_2\text{ZnSnS}_4$ Photocathodes Using a Composite (Zn,Ti)O Electron Transport Layer for Solar Water Splitting**

*Siyuan Ren, Muhammad Abbas\*, Zhibin Xie, Zilin Lu, Jasim Yousaf, Muhammad Ishaq, Zhuanghao Zheng, Jun Zhao, Shuo Chen\*, and Guangxing Liang\**

S. Ren, M. Abbas, Z. Xie, Z. Lu, J. Yousaf, M. Ishaq, Z. Zheng, J. Zhao, S. Chen, G. Liang

Institute of Thin Film Physics and Applications, Shenzhen Key Laboratory of Advanced Thin Films and Applications, Key Laboratory of Optoelectronic Devices and Systems of Ministry of Education and Guangdong Province, State Key Laboratory of Intelligent Construction and Healthy Operation and Maintenance of Deep Underground Engineering, College of Physics and Optoelectronic Engineering, Shenzhen University, Shenzhen, 518060, China

E-mail: [abbas.cssp@hotmail.com](mailto:abbas.cssp@hotmail.com) (M. Abbas); [chensh@szu.edu.cn](mailto:chensh@szu.edu.cn) (S. Chen); [lgx@szu.edu.cn](mailto:lgx@szu.edu.cn) (G. Liang)

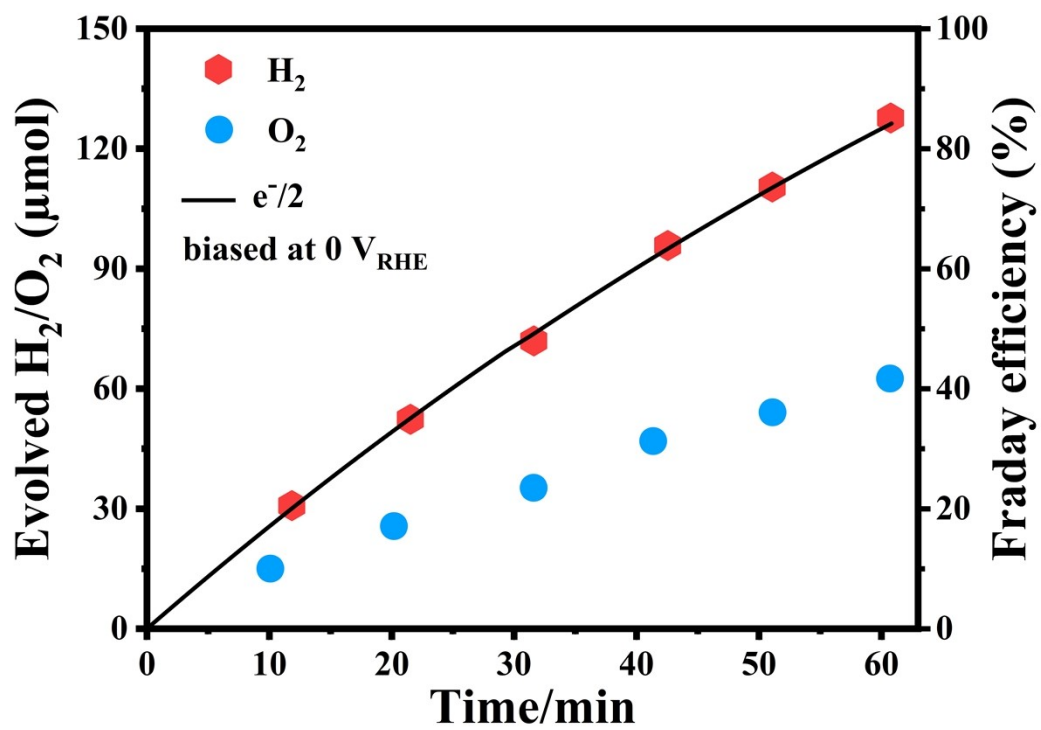

**Figure S1.** H<sub>2</sub> generation amount as a function of AM 1.5G solar light illumination time over PC-2 at 0 V<sub>RHE</sub> for 1 h in pH 1 buffer solution.

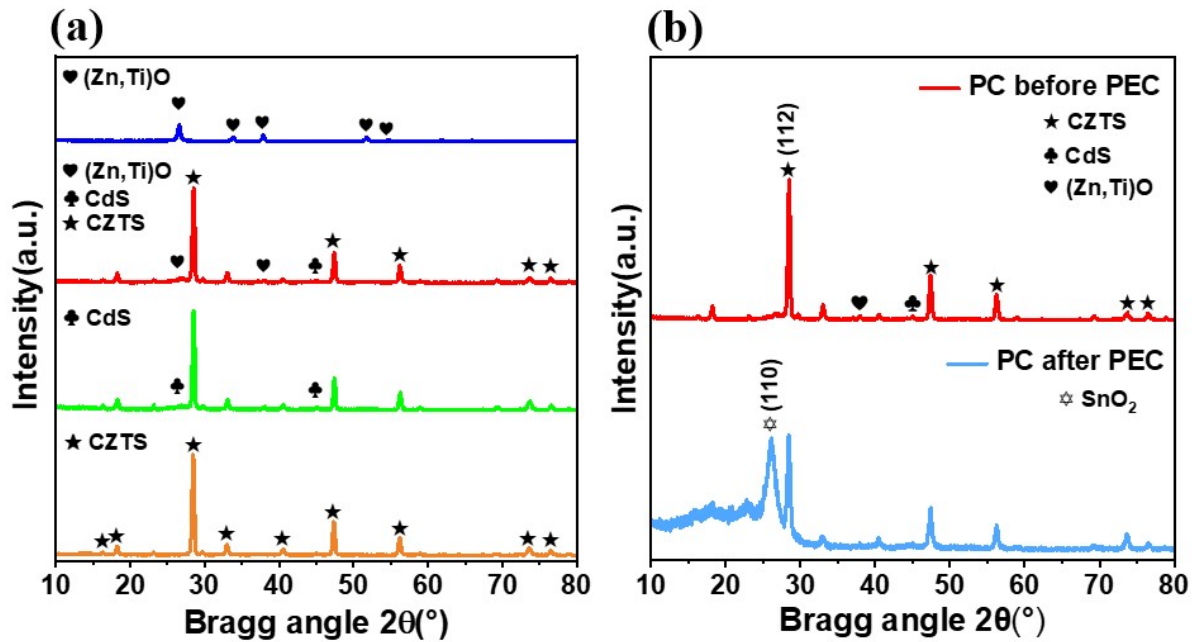

**Figure S2.** XRD patterns of PC-2 photocathode. (a) Before PEC operation; (b) After PEC operation.

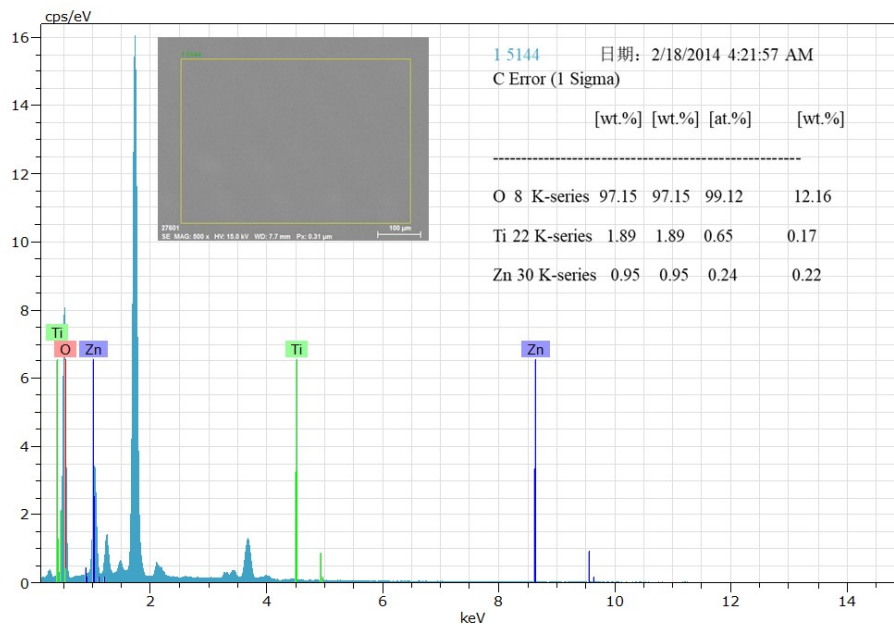

**Figure S3.** EDS analysis of (Zn,Ti)O film prepared through ALD method

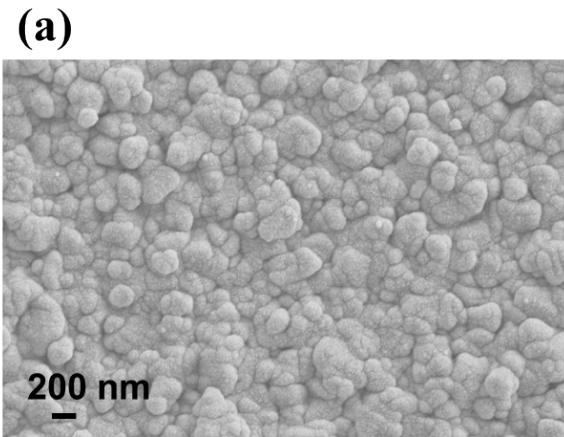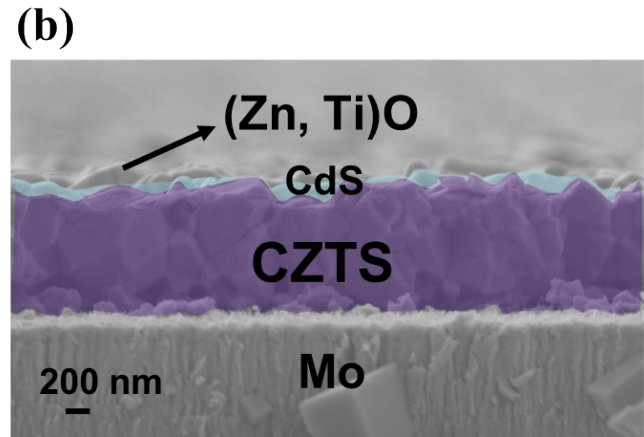

**Figure S4.** Post-PEC microstructural characterization of PC-2 photocathode. (a) Surface SEM image; (b) Cross-sectional SEM image.
